# Supplementary material
Source: Springer Nature journal article supplement (https://www.springermedizin.de/resource/supplementary/12891_2012_1637_MOESM3_ESM.pdf/9508144)

CA1-Tg mice with  
injection of collagen

wide type mice with  
injection of collagen

PADI4-Tg mice with  
injection of collagen

CA1-Tg mice with  
injection of BSA

paw  
joints

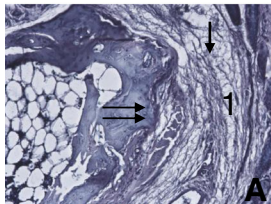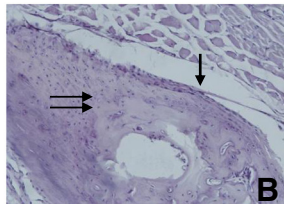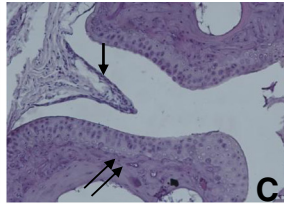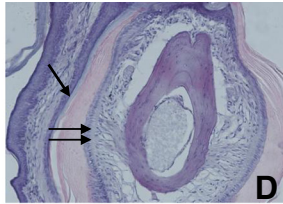

ankle  
joints

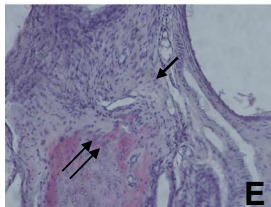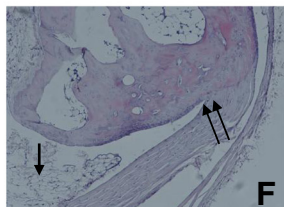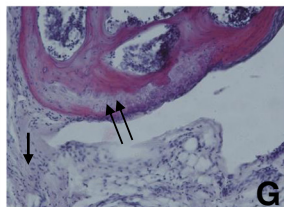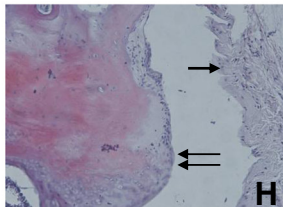

knee  
joints

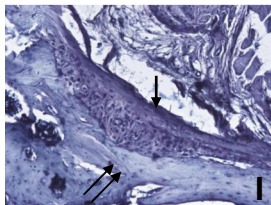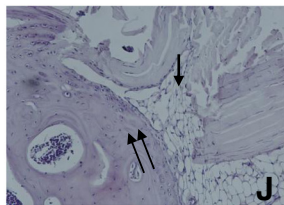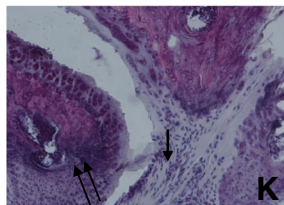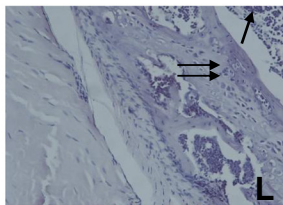

sacroiliac  
joints

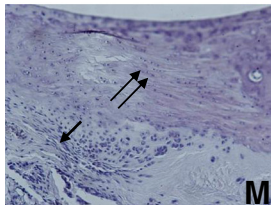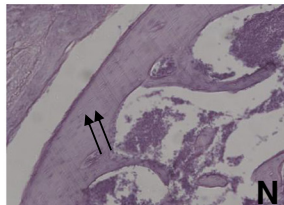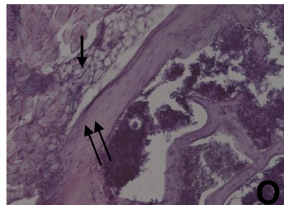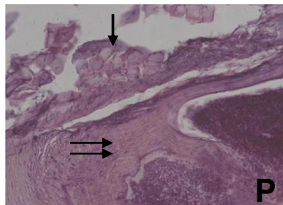

Supplement: MOESM3 [file 9508144]
